# Supplementary material
Source: HighWire-hosted journal article supplement (https://gut.bmj.com/content/72/12/2231)

## APPENDIX

This appendix has been provided by the authors to give readers additional information about the work. Supplement to: Lei WY, Lee JY, Chuang SL, *et al.* Eradicating *Helicobacter pylori* via <sup>13</sup>C-urea breath screening to prevent gastric cancer in indigenous communities: A population-based study and development of a family index-case method

| Item                         | Description                                                                                                                                                                                                                                                                           |
|------------------------------|---------------------------------------------------------------------------------------------------------------------------------------------------------------------------------------------------------------------------------------------------------------------------------------|
| <b>Supplementary Table 1</b> | Baseline characteristics of participants for the family history, medical history, and ethnic groups, with relationship to <i>Helicobacter pylori</i> infection                                                                                                                        |
| <b>Supplementary Table 2</b> | The infection-pedigree relationships in a representative Taiwanese indigenous township in the proof-of-concept study. (A) <i>H. pylori</i> infection status of the index case and his/her family members, and (B) <i>H. pylori</i> infection status in the consanguinity relationship |
| <b>Supplementary Table 3</b> | The risk of <i>H. pylori</i> infection according to the status of the index case and his/her family members. (A) Results in the proof-of-concept study and (B) results in the mass screening setting                                                                                  |
| <b>Supplementary Table 4</b> | Referral-to-treatment rate in the participants who tested positive for <i>H. pylori</i> infection and results of the first-line eradication treatment                                                                                                                                 |
| <b>Supplementary Table 5</b> | Reinfection rates of <i>H. pylori</i> in the Taiwanese indigenous communities                                                                                                                                                                                                         |
| <b>Supplementary Fig. 1</b>  | The workflow of the screening and eradication program                                                                                                                                                                                                                                 |
| <b>Supplementary Fig. 2</b>  | Risk factors associated with the 797 treatment failure among 4601 subjects who received the first-line treatment for <i>H. pylori</i> infection according to the per-protocol analyses                                                                                                |
| <b>Supplementary Fig. 3</b>  | Risk factors associated with the 25 reinfection of <i>H. pylori</i> after successful eradication in 498 subjects                                                                                                                                                                      |

**Supplementary Table 1. Baseline characteristics of participants for the family history, medical history, and ethnic groups, with relationship to *Helicobacter pylori* infection**

| Baseline characteristics                     | Indigenous peoples (N=8852) |                                      | Non-indigenous peoples (N=6205) |                                      |
|----------------------------------------------|-----------------------------|--------------------------------------|---------------------------------|--------------------------------------|
|                                              | No. of subjects             | No. of <i>H. pylori</i> carriers (%) | No. of subjects                 | No. of <i>H. pylori</i> carriers (%) |
|                                              | 8852                        | 5055 (57.1)                          | 6205                            | 1588 (25.6)                          |
| Family history                               |                             |                                      |                                 |                                      |
| Family history of <i>H. pylori</i> infection | 681                         | 360 (52.9)                           | 437                             | 117 (26.8)                           |
| Family history of peptic ulcer               | 1135                        | 630 (55.5)                           | 695                             | 177 (25.5)                           |
| Family history of gastric cancer             | 489                         | 274 (56.0)                           | 139                             | 47 (33.8)                            |
| Medical history                              |                             |                                      |                                 |                                      |
| Personal history of peptic ulcer             | 1075                        | 538 (50.0)                           | 446                             | 101 (22.6)                           |
| Previous <i>H. pylori</i> infection          | 710                         | 172 (24.2)                           | 374                             | 56 (15.0)                            |
| Non-steroidal anti-inflammatory drug user    | 1958                        | 1132 (57.8)                          | 1343                            | 316 (23.5)                           |
| Anti-platelet agent user                     | 130                         | 69 (53.1)                            | 58                              | 18 (31.0)                            |
| Anti-coagulant user                          | 97                          | 51 (52.6)                            | 43                              | 13 (30.2)                            |
| Diabetic drug user                           | 754                         | 463 (61.4)                           | 223                             | 82 (36.8)                            |
| Iron supplement user                         | 113                         | 64 (56.6)                            | 53                              | 9 (17.0)                             |
| Ethnic groups*                               |                             |                                      |                                 |                                      |
| Amis                                         | 2683                        | 1331 (49.6)                          | -                               | -                                    |
| Bunun                                        | 1394                        | 940 (67.4)                           | -                               | -                                    |
| Cou                                          | 12                          | 9 (75)                               | -                               | -                                    |
| Hla'alua                                     | 22                          | 13 (59.1)                            | -                               | -                                    |

|                |      |             |   |   |
|----------------|------|-------------|---|---|
| Kanakanavu     | 28   | 21 (75)     | - | - |
| Kebalan        | 37   | 20 (54.1)   | - | - |
| Paiwan         | 1168 | 656 (56.2)  | - | - |
| Puyuma         | 300  | 169 (56.3)  | - | - |
| Rukai          | 302  | 189 (62.6)  | - | - |
| Sakizaya       | 23   | 10 (43.5)   | - | - |
| Say-Siyat      | 5    | 1 (20)      | - | - |
| Seediq         | 96   | 61 (63.5)   | - | - |
| Tao/Yami       | 193  | 100 (51.8)  | - | - |
| Taroko         | 1669 | 1000 (59.9) | - | - |
| Tayal          | 822  | 492 (59.9)  | - | - |
| Missing values | 98   | 43 (43.9)   | - | - |

\* There were 16 officially recognized ethnic groups in Taiwanese indigenous peoples. Every ethnic group has its own distinct culture, language, customs and social structure.

**Supplementary Table 2. The infection-pedigree relationships in a representative Taiwanese indigenous township in the proof-of-concept study**

**(A) *H. pylori* infection status of the index case and his/her family members**

| Family no. | Family name | Index case (age) | Family member (age) |     |     |     |     |     |
|------------|-------------|------------------|---------------------|-----|-----|-----|-----|-----|
|            |             |                  | ●40                 | ■45 | ●21 |     |     |     |
| 1          | C1          | ●22              | ●40                 | ■45 | ●21 |     |     |     |
| 2          | C10         | ■49              | ●22                 | ■29 | □28 | ●52 | ○24 | ●21 |
| 3          | C11         | ●30              | ●63                 | ■25 | ■67 | ■31 | ■43 |     |
| 4          | C12         | ■64              | ■41                 | ●50 | ○63 |     |     |     |
| 5          | C14         | ●54              | ■57                 | ●32 | ●54 | ○45 | ●24 |     |
| 6          | C16         | ○48              | ■65                 | □20 | ■55 | □27 |     |     |
| 7          | C17         | ■46              | □16                 | ○38 |     |     |     |     |
| 8          | C18         | ○55              | ■60                 | ●23 | □30 | ○34 |     |     |
| 9          | C19         | ■64              | ○62                 |     |     |     |     |     |
| 10         | C2          | ○56              | ■54                 | ●54 |     |     |     |     |
| 11         | C20         | ■58              | ○55                 | ●36 | □37 | ■34 |     |     |
| 12         | C21         | ●56              | □19                 | □55 |     |     |     |     |
| 13         | C22         | ●70              | □36                 | ○35 |     |     |     |     |
| 14         | C23         | ●37              | ○28                 |     |     |     |     |     |
| 15         | C24         | ●49              | □50                 | ●29 |     |     |     |     |
| 16         | C25         | ●56              | ○27                 | ■32 | ■31 | ■38 |     |     |
| 17         | C27         | ■62              | ■29                 | ●60 | □40 |     |     |     |
| 18         | C28         | ■26              | ■49                 | ●26 |     |     |     |     |
| 19         | C29         | ■62              | ●66                 | ■37 |     |     |     |     |
| 20         | C3          | ●54              | □29                 | ■60 | □31 | ○28 |     |     |
| 21         | C30         | ■42              | ○28                 |     |     |     |     |     |
| 22         | C31         | ■44              | ●55                 | ■29 |     |     |     |     |
| 23         | C32         | ■61              | ●60                 |     |     |     |     |     |
| 24         | C33         | □30              | ○28                 | ○60 |     |     |     |     |
| 25         | C4          | ○32              | ○59                 | ■34 |     |     |     |     |

|    |     |     |     |     |     |     |     |  |
|----|-----|-----|-----|-----|-----|-----|-----|--|
| 26 | C5  | ○65 | ■66 |     |     |     |     |  |
| 27 | C6  | □38 | ●38 | ○70 |     |     |     |  |
| 28 | C7  | ●43 | ■43 | ○76 | ●31 |     |     |  |
| 29 | C8  | □58 | ■24 |     |     |     |     |  |
| 30 | F1  | ●53 | □59 | ●29 | ■26 |     |     |  |
| 31 | F10 | ●52 | ■40 | ●34 | ●37 |     |     |  |
| 32 | F11 | ■27 | ■53 |     |     |     |     |  |
| 33 | F12 | ■69 | ●61 | ■45 |     |     |     |  |
| 34 | F13 | ●70 | ●41 | ●46 | □44 | ■45 |     |  |
| 35 | F14 | ■86 | □60 | ○49 | ●48 | ○85 | ■58 |  |
| 36 | F15 | ●37 | □68 | ■35 | ■46 | ●61 |     |  |
| 37 | F17 | ●53 | ●26 | ●21 |     |     |     |  |
| 38 | F2  | ○68 | ■67 |     |     |     |     |  |
| 39 | F3  | ●42 | ●33 | ●66 |     |     |     |  |
| 40 | F4  | ●40 | □43 |     |     |     |     |  |
| 41 | F5  | ●43 | ○15 | ■76 | □40 |     |     |  |
| 42 | F6  | □52 | ○47 |     |     |     |     |  |
| 43 | F9  | ■72 | ●38 | ■50 | ●48 | ●66 | □45 |  |
| 44 | S1  | ○72 | ●52 | ○50 |     |     |     |  |
| 45 | S2  | ■34 | □32 | ■31 | ●53 | ●27 |     |  |
| 46 | W1  | ●52 | ■55 | ■24 | ■28 | ●26 |     |  |
| 47 | W12 | ■67 | ●39 |     |     |     |     |  |
| 48 | W15 | ●56 | ■61 | ■38 | ■35 | ○35 |     |  |
| 49 | W16 | ○53 | ■31 | ●32 | ●29 | ●31 |     |  |
| 50 | W17 | ○58 | ■36 | ■61 |     |     |     |  |
| 51 | W18 | ○32 | ■39 | ■63 |     |     |     |  |
| 52 | W19 | ■48 | ●11 | ■18 |     |     |     |  |
| 53 | W20 | ○58 | ●33 |     |     |     |     |  |
| 54 | W21 | ●51 | ○24 | ■28 |     |     |     |  |

|    |     |     |     |     |     |     |     |  |
|----|-----|-----|-----|-----|-----|-----|-----|--|
| 55 | W22 | ○31 | ○36 | ●23 | ○57 | □53 |     |  |
| 56 | W23 | □50 | ○50 | □23 |     |     |     |  |
| 57 | W28 | ●42 | ■47 | ●44 | ○43 |     |     |  |
| 58 | W3  | ○62 | □65 | ■30 |     |     |     |  |
| 59 | W30 | ○54 | ○81 | ○29 | ■61 | ○32 |     |  |
| 60 | W31 | ●58 | ■61 |     |     |     |     |  |
| 61 | W32 | □43 | ■79 | ●69 | □47 | ○35 | □27 |  |
| 62 | W33 | ○55 | ○22 | □57 |     |     |     |  |
| 63 | W35 | ●61 | ■61 | □27 |     |     |     |  |
| 64 | W36 | ○50 | □22 | ○25 | ■54 |     |     |  |
| 65 | W37 | ●61 | ■40 | ●36 |     |     |     |  |
| 66 | W38 | ■56 | ●81 | □88 |     |     |     |  |
| 67 | W40 | □61 | ■30 | ●28 |     |     |     |  |
| 68 | W41 | ■71 | ●46 |     |     |     |     |  |
| 69 | W6  | ○33 | ○61 | ■69 | ○41 |     |     |  |
| 70 | W7  | ●57 | ●68 | ■63 |     |     |     |  |
| 71 | W8  | ●46 | ■53 | □18 | ●20 |     |     |  |
| 72 | W9  | ●61 | □58 | ●35 |     |     |     |  |

A square indicates the male sex and a circle indicates the female sex. The black color indicates the positivity for the *H. pylori* infection while the white color indicates negativity.

\* In the proof-of-concept study, there was no age restriction for enrollment.

#### (B) *H. pylori* infection status in the consanguinity relationship

|              |                |                |
|--------------|----------------|----------------|
|              | Spouse +       | Spouse –       |
| Index case + | 19             | 11             |
| Index case – | 8              | 5              |
|              | Sibling +      | Sibling –      |
| Index case + | 13             | 5              |
| Index case – | 5              | 4              |
|              | Parent-child + | Parent-child – |
| Index case + | 48             | 19             |
| Index case – | 14             | 16             |

+ indicates *H. pylori* infection; – indicates *H. pylori* non-infection

**Supplementary Table 3. The risk of *H. pylori* infection among the family members according to the status of the index case and his/her family members**

**(A) Results in the proof-of-concept study**

|                                             | OR   | 95% CI    | aOR* | 95% CI    |
|---------------------------------------------|------|-----------|------|-----------|
| <b>Status of the index case<sup>†</sup></b> |      |           |      |           |
| <sup>13</sup> C UBT results                 |      |           |      |           |
| Negative index case                         | 1    |           | 1    |           |
| Positive index case                         | 1.89 | 0.97–3.66 | 1.98 | 1.03–3.80 |
| Age                                         |      |           |      |           |
| Increase of 10 years                        | 0.99 | 0.77–1.28 | 0.96 | 0.74–1.25 |
| Sex                                         |      |           |      |           |
| Female                                      | 1    |           | 1    |           |
| Male                                        | 0.81 | 0.43–1.55 | 0.55 | 0.27–1.10 |
| Smoking                                     |      |           |      |           |
| Never                                       | 1    |           | 1    |           |
| Former                                      | 2.51 | 1.05–6.05 | 2.87 | 1.17–7.02 |
| Current                                     | 2.98 | 1.43–6.23 | 2.87 | 1.31–6.33 |

Abbreviations: aOR, adjusted odds ratio; CI, confidence interval; UBT, urea breath test

\* Adjusted for the age, sex, and the smoking habit in the generalized estimated equation models.

<sup>†</sup> All the participants in the proof-of-concept study were indigenous.

**(B) Results in the mass screening setting**

|                                 | OR   | 95% CI    | aOR* | 95% CI    |
|---------------------------------|------|-----------|------|-----------|
| <b>Status of the index case</b> |      |           |      |           |
| <sup>13</sup> C UBT results     |      |           |      |           |
| Negative index case             | 1    |           | 1    |           |
| Positive index case             | 2.28 | 1.90–2.74 | 1.95 | 1.61–2.36 |
| Indigenous status <sup>†</sup>  |      |           |      |           |
| Non-indigenous                  | 1    |           | 1    |           |
| Indigenous                      | 2.68 | 2.20–3.27 | 2.31 | 1.88–2.84 |
| Age                             |      |           |      |           |
| Increase of 10 years            | 1.22 | 1.14–1.31 | 1.22 | 1.13–1.32 |
| Sex                             |      |           |      |           |
| Female                          | 1    |           | 1    |           |
| Male                            | 1.28 | 1.08–1.52 | 1.15 | 0.95–1.39 |
| Smoking                         |      |           |      |           |
| Never                           | 1    |           | 1    |           |
| Former                          | 1.38 | 1.07–1.77 | 1.13 | 0.85–1.50 |
| Current                         | 1.84 | 1.49–2.27 | 1.51 | 1.20–1.90 |

Abbreviations: aOR, adjusted odds ratio; CI, confidence interval; UBT, urea breath test

\* Adjusted for the age, sex, smoking habit, and the indigenous status in the generalized estimated equation models.

<sup>†</sup> Participants in the mass screening setting included both indigenous and non-indigenous peoples.

**Supplementary Table 4. The referral-to-treatment rate in the participants who tested positive for *H. pylori* infection and results of the first-line eradication treatment**

|                        | No. of participants | Test positive, no. (%) | First-line treatment |                  |                           |
|------------------------|---------------------|------------------------|----------------------|------------------|---------------------------|
|                        |                     |                        | Treat, no. (%)       | Re-test, no. (%) | Re-test positive, no. (%) |
| Indigenous peoples     |                     |                        |                      |                  |                           |
| Male                   |                     |                        |                      |                  |                           |
| 20–39                  | 1197                | 648 (54.1)             | 499 (77.0)           | 417 (83.6)       | 110 (26.4)                |
| 40–60                  | 1947                | 1198 (61.5)            | 974 (81.3)           | 843 (86.6)       | 166 (19.7)                |
| Subtotal               | 3144                | 1846 (58.7)            | 1473 (79.8)          | 1260 (85.5)      | 276 (21.9)                |
| Female                 |                     |                        |                      |                  |                           |
| 20–39                  | 2071                | 1101 (53.2)            | 876 (79.6)           | 733 (83.7)       | 206 (28.1)                |
| 40–60                  | 3637                | 2108 (58.0)            | 1802 (85.5)          | 1573 (87.3)      | 350 (22.3)                |
| Subtotal               | 5708                | 3209 (56.2)            | 2678 (83.5)          | 2306 (86.1)      | 556 (24.1)                |
| Both sexes             |                     |                        |                      |                  |                           |
| 20–39                  | 3268                | 1749 (53.5)            | 1375 (78.6)          | 1150 (83.6)      | 316 (27.5)                |
| 40–60                  | 5584                | 3306 (59.2)            | 2776 (84.0)          | 2416 (87.0)      | 516 (21.4)                |
| Total                  | 8852                | 5055 (57.1)            | 4151 (82.1)          | 3566 (85.9)      | 832 (23.3)                |
| Non-indigenous peoples |                     |                        |                      |                  |                           |
| Male                   |                     |                        |                      |                  |                           |
| 20–39                  | 856                 | 148 (17.3)             | 123 (83.1)           | 110 (89.4)       | 19 (17.3)                 |
| 40–60                  | 1457                | 461 (31.6)             | 394 (85.5)           | 354 (89.8)       | 64 (18.1)                 |
| Subtotal               | 2313                | 609 (26.3)             | 517 (84.9)           | 464 (89.7)       | 83 (17.9)                 |
| Female                 |                     |                        |                      |                  |                           |
| 20–39                  | 1293                | 217 (16.8)             | 179 (82.5)           | 165 (92.2)       | 27 (16.4)                 |
| 40–60                  | 2599                | 762 (29.3)             | 646 (84.8)           | 577 (89.3)       | 82 (14.2)                 |
| Subtotal               | 3892                | 979 (25.2)             | 825 (84.3)           | 742 (89.9)       | 109 (14.7)                |
| Both sexes             |                     |                        |                      |                  |                           |
| 20–39                  | 2149                | 365 (17.0)             | 302 (82.7)           | 275 (91.1)       | 46 (16.7)                 |
| 40–60                  | 4056                | 1223 (30.2)            | 1040 (85.0)          | 931 (89.5)       | 146 (15.7)                |
| Total                  | 6205                | 1588 (25.6)            | 1342 (84.5)          | 1206 (89.9)      | 192 (15.9)                |
| Overall                | 15057               | 6643 (44.1)            | 5493 (82.7)          | 4772 (86.9)      | 1024 (21.5)               |



**Supplemental Table 5. Reinfection rates of *H. pylori* in the Taiwanese indigenous communities**

| Characteristics                              | No. of subjects | No. of reinfection | Mean follow-up time (years) | Total follow-up time (person-years) | Reinfection rate (%) |
|----------------------------------------------|-----------------|--------------------|-----------------------------|-------------------------------------|----------------------|
| Total                                        | 498             | 25                 | 3.15                        | 1569.02                             | 1.59                 |
| Infection naïve                              | 381             | 23                 | 3.25                        | 1238.36                             | 1.86                 |
| Previous infected individuals                | 290             | 18                 | 3.11                        | 902.37                              | 1.99                 |
| Age, in years                                |                 |                    |                             |                                     |                      |
| 20–29                                        | 39              | 3                  | 3.03                        | 118.22                              | 2.54                 |
| 30–39                                        | 123             | 6                  | 3.10                        | 381.61                              | 1.57                 |
| 40–49                                        | 166             | 8                  | 3.20                        | 531.27                              | 1.51                 |
| 50+                                          | 170             | 8                  | 3.16                        | 537.92                              | 1.49                 |
| Sex                                          |                 |                    |                             |                                     |                      |
| Male                                         | 151             | 11                 | 3.09                        | 467.25                              | 2.35                 |
| Female                                       | 347             | 14                 | 3.18                        | 1101.77                             | 1.27                 |
| Medical history                              |                 |                    |                             |                                     |                      |
| Family history of <i>H. pylori</i> infection | 35              | 1                  | 3.12                        | 109.23                              | 0.92                 |
| Family history of peptic ulcer               | 82              | 1                  | 3.19                        | 261.98                              | 0.38                 |
| Family history of gastric cancer             | 30              | 3                  | 3.36                        | 100.72                              | 2.98                 |
| Personal history of peptic ulcer             | 67              | 4                  | 3.24                        | 217.16                              | 1.84                 |
| Previous <i>H. pylori</i> infection          | 36              | 1                  | 3.28                        | 117.96                              | 0.85                 |
| Non-steroidal anti-inflammatory drug         | 100             | 8                  | 3.15                        | 315.40                              | 2.54                 |
| Diabetic drug                                | 28              | 2                  | 3.26                        | 91.37                               | 2.19                 |
| Iron supplement                              | 4               | 0                  | 3.40                        | 13.61                               | 0.00                 |
| Social habit                                 |                 |                    |                             |                                     |                      |
| Smoking                                      |                 |                    |                             |                                     |                      |
| Current                                      | 63              | 6                  | 3.20                        | 201.80                              | 2.97                 |
| Former                                       | 58              | 6                  | 3.06                        | 177.60                              | 3.38                 |
| Never                                        | 377             | 13                 | 3.16                        | 1189.62                             | 1.09                 |
| Alcohol use                                  |                 |                    |                             |                                     |                      |
| Current                                      | 280             | 20                 | 3.20                        | 896.49                              | 2.23                 |
| Former                                       | 22              | 0                  | 3.14                        | 69.14                               | 0.00                 |

---

|                   |         |     |    |      |         |      |
|-------------------|---------|-----|----|------|---------|------|
|                   | Never   | 196 | 5  | 3.08 | 603.39  | 0.83 |
| Betel nut chewing | Current | 105 | 11 | 3.20 | 336.43  | 3.27 |
|                   | Former  | 42  | 4  | 3.22 | 135.08  | 2.96 |
|                   | Never   | 351 | 10 | 3.13 | 1097.51 | 0.91 |

---

**Supplementary Fig. 1. The workflow of the screening and eradication program**

Following the principles of an organized screening program, four quality indicators, including the invitation rate, positivity rate, referral-to-treatment rate, and the eradication rate were monitored periodically in an on-line system. The orange color indicates the *H. pylori* carriers and the blue indicates the non-carriers or those who received successful eradication treatments.

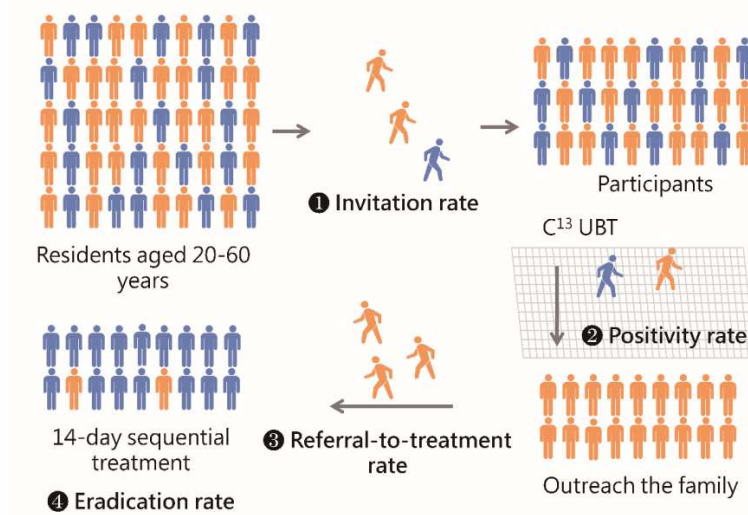**Supplementary Fig. 2. Risk factors associated with the 797 treatment failure among 4601 subjects who received the first-line treatment for *H. pylori* infection according to the per-protocol analyses**

The multivariable logistic regression model adjusts for all variables shown in the forest plot. An odds ratio greater than 1.0 indicates an increased risk of treatment failure. The use of anti-platelet agent is not included in the multivariate analyses due to the small case numbers. CI = confidence interval.

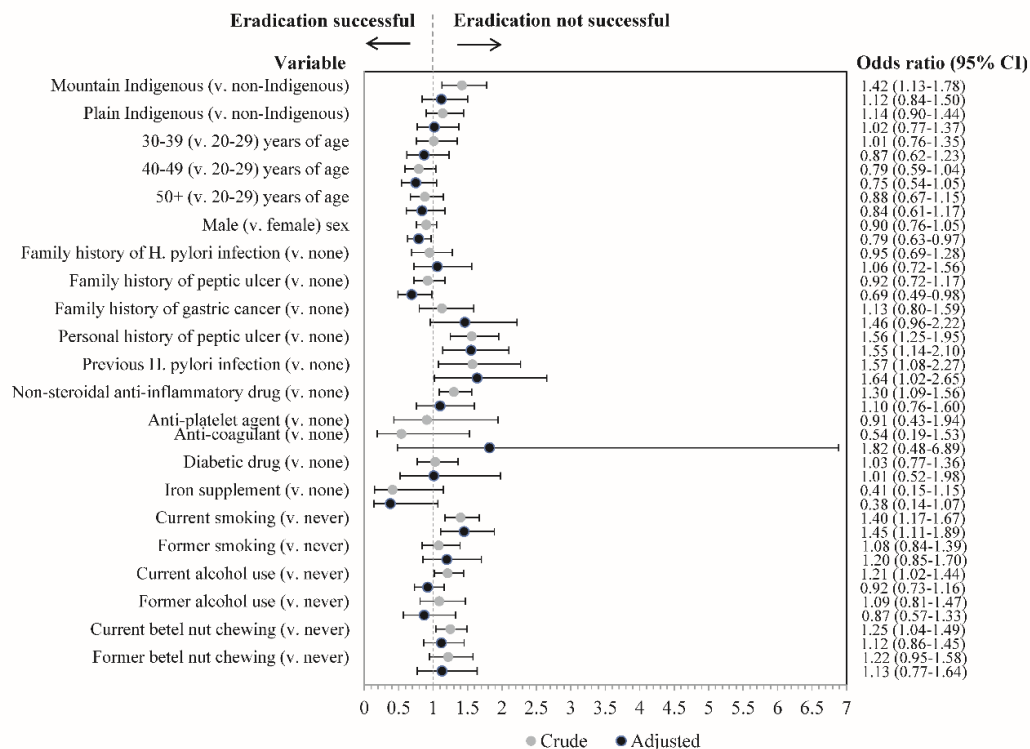

### Supplementary Fig. 3. Risk factors associated with the 25 reinfection of *H. pylori* after successful eradication in 498 subjects

A rate ratio greater than 1.0 indicates an increased risk of the reinfection. Results of the Poisson regression models are shown in the forest plot. An odds ratio greater than 1.0 indicates an increased risk of reinfection. CI = confidence interval. Owing to the small reinfection case number, only univariate analyses are performed. There was no case of reinfection in the former alcohol users.

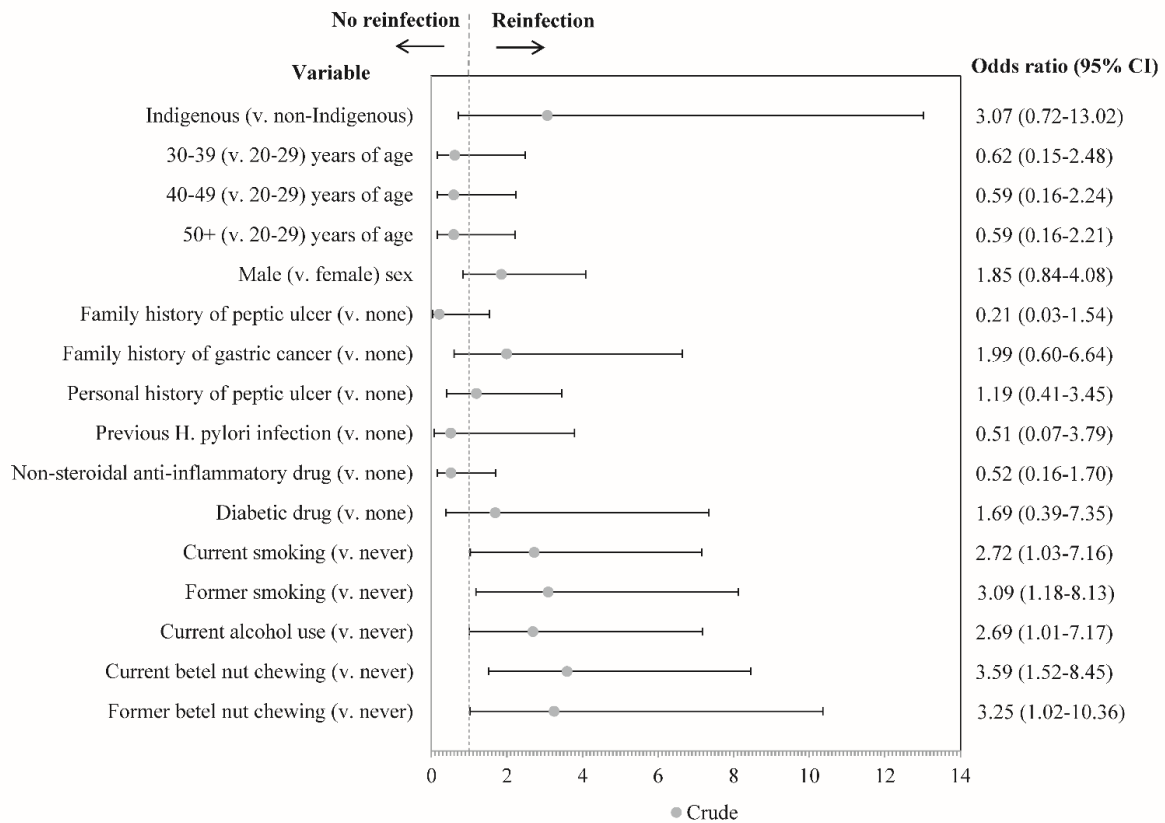

Supplement: inline-supplementary-material-1 [file inline-supplementary-material-1.pdf]
